# Supplementary material for: Neuregulin signaling pathway in smoking behavior
Source: PubMed Central journal article supplement (PMC5611747; doi:10.1038/tp.2017.183), 2017-08-22

**Supplementary figure 1.** Haploview plots showing the LD structure for the highlighted 66 SNPs in *NRG1*, *ERBB4*, *NRG3*, *BACE1*, *APH1A*, and *PSEN2* in discovery phase. For each gene plots indicating  $R^2$  and  $D'$  values are presented. Block boundaries were defined by the 'Solid spine of LD' option of Haploview.

a) *NRG1*  
 $R^2$

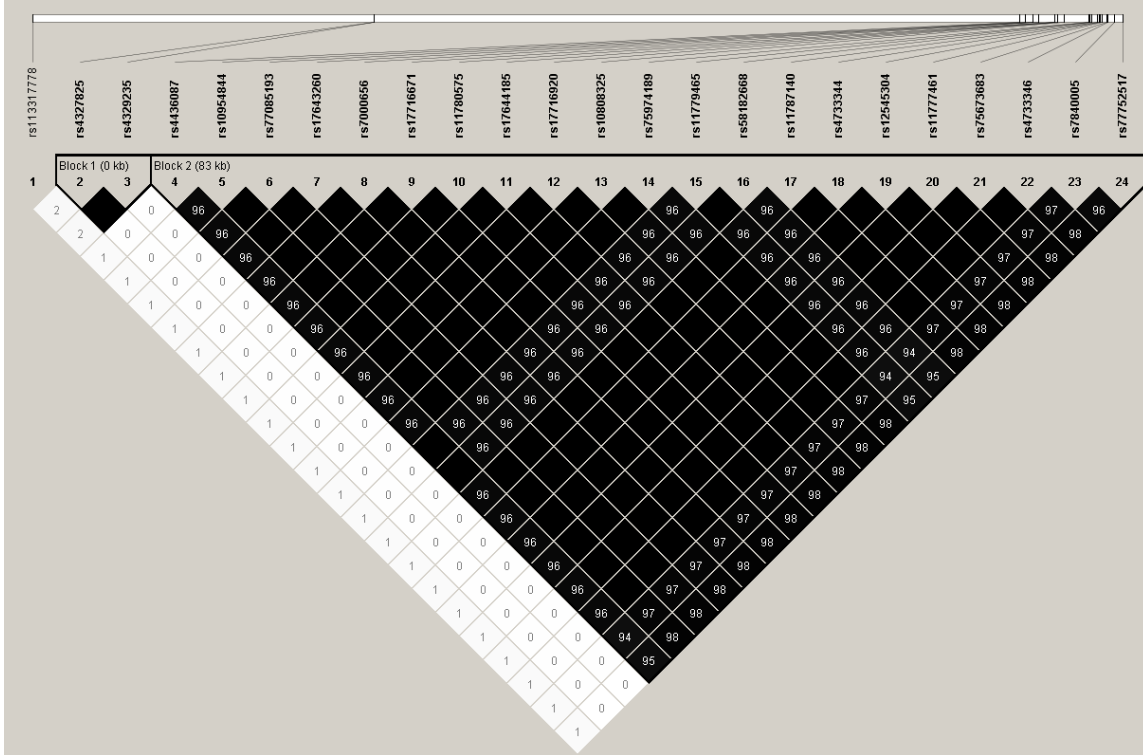

$D'$

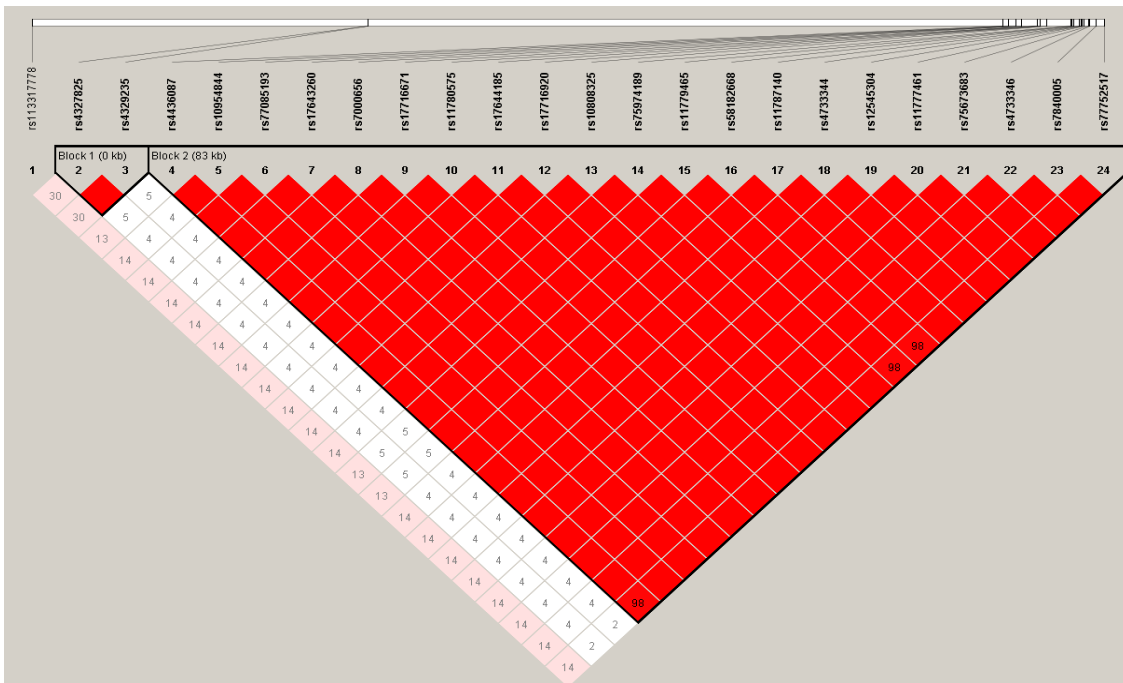

b) *ERBB4*  
R<sup>2</sup>

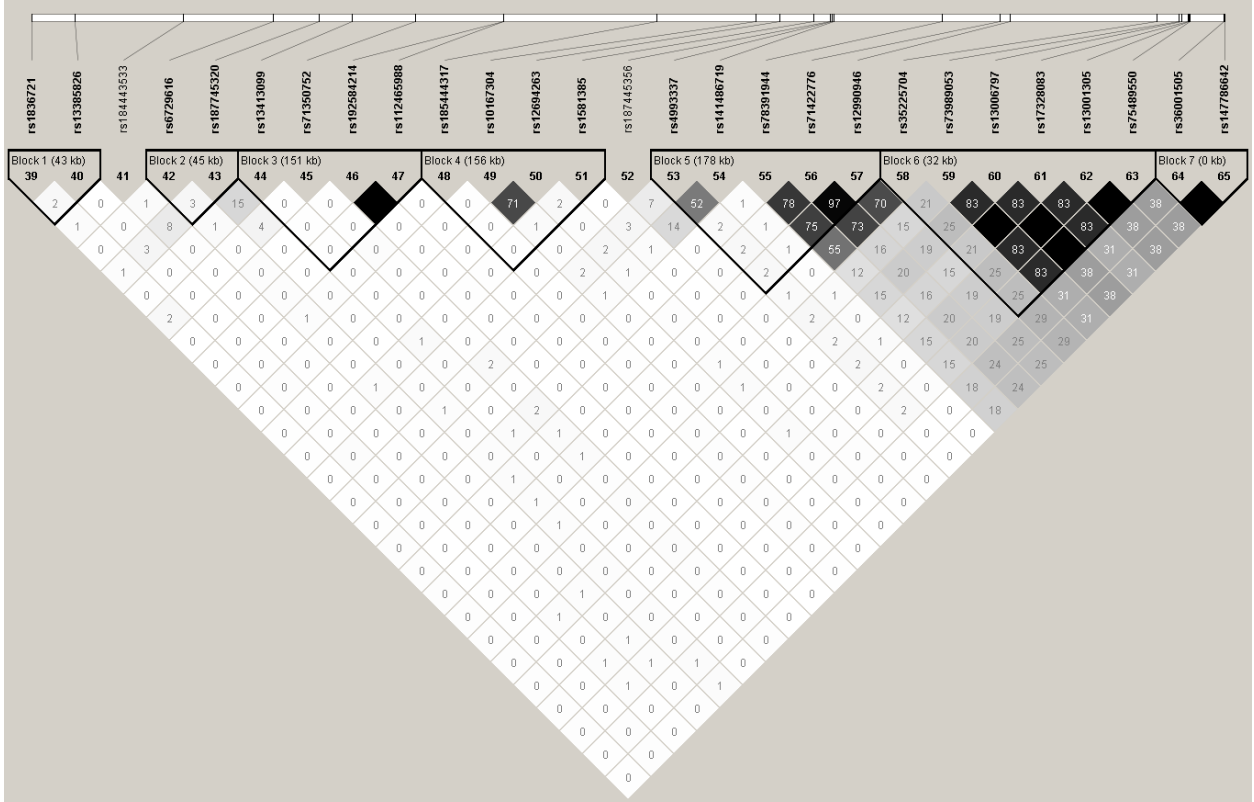

D'

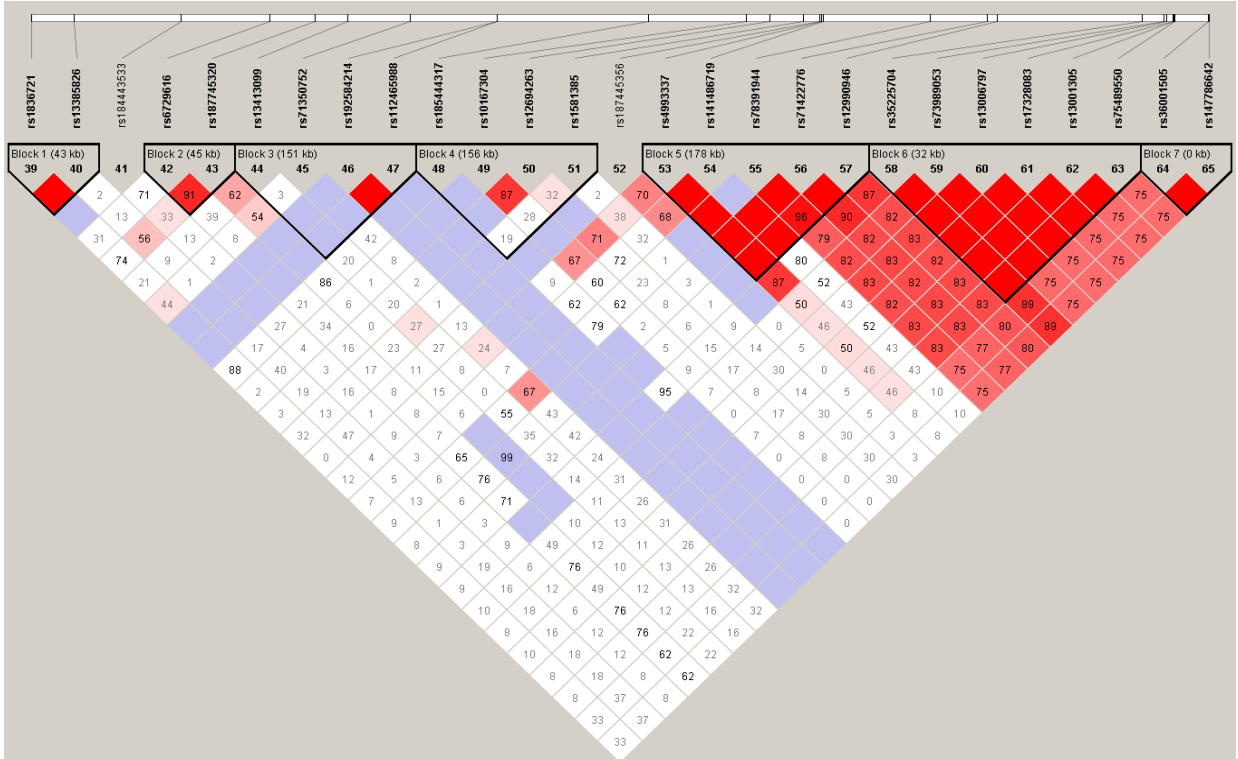

c) *NRG3*  
R<sup>2</sup>

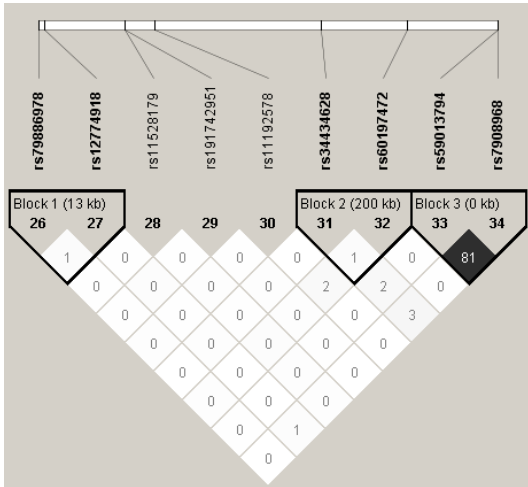

D'

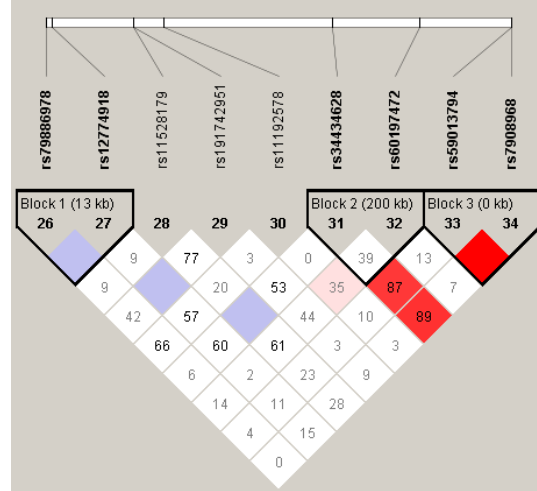

d) *APH1A* and *PSEN2*  
R<sup>2</sup>

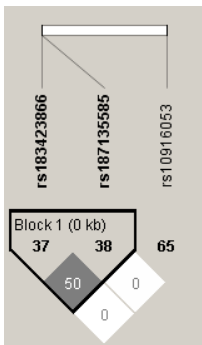

D'

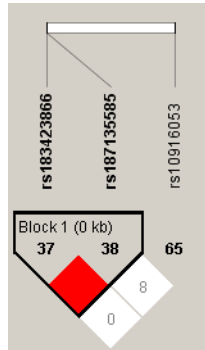

e) *BACE1*  
R<sup>2</sup>

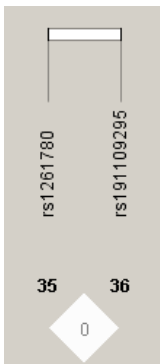

D'

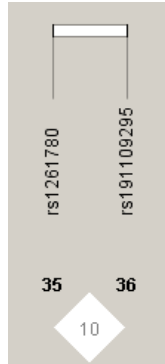

Supplement: tp2017183x1.pdf [file tp2017183x1.pdf]
