# Supplementary material for: Neuregulin signaling pathway in smoking behavior
Source: PubMed Central journal article supplement (PMC5611747; doi:10.1038/tp.2017.183), 2017-08-22

**Supplementary figure 2.** Regional plots for the SI associated SNPs in *ERBB4*, *NRG1*, *NRG3*, *BACE1*, *APH1A*, *PSEN2*, and *PSENE1*. Threshold line corresponds to FDR  $p=0.05$ .

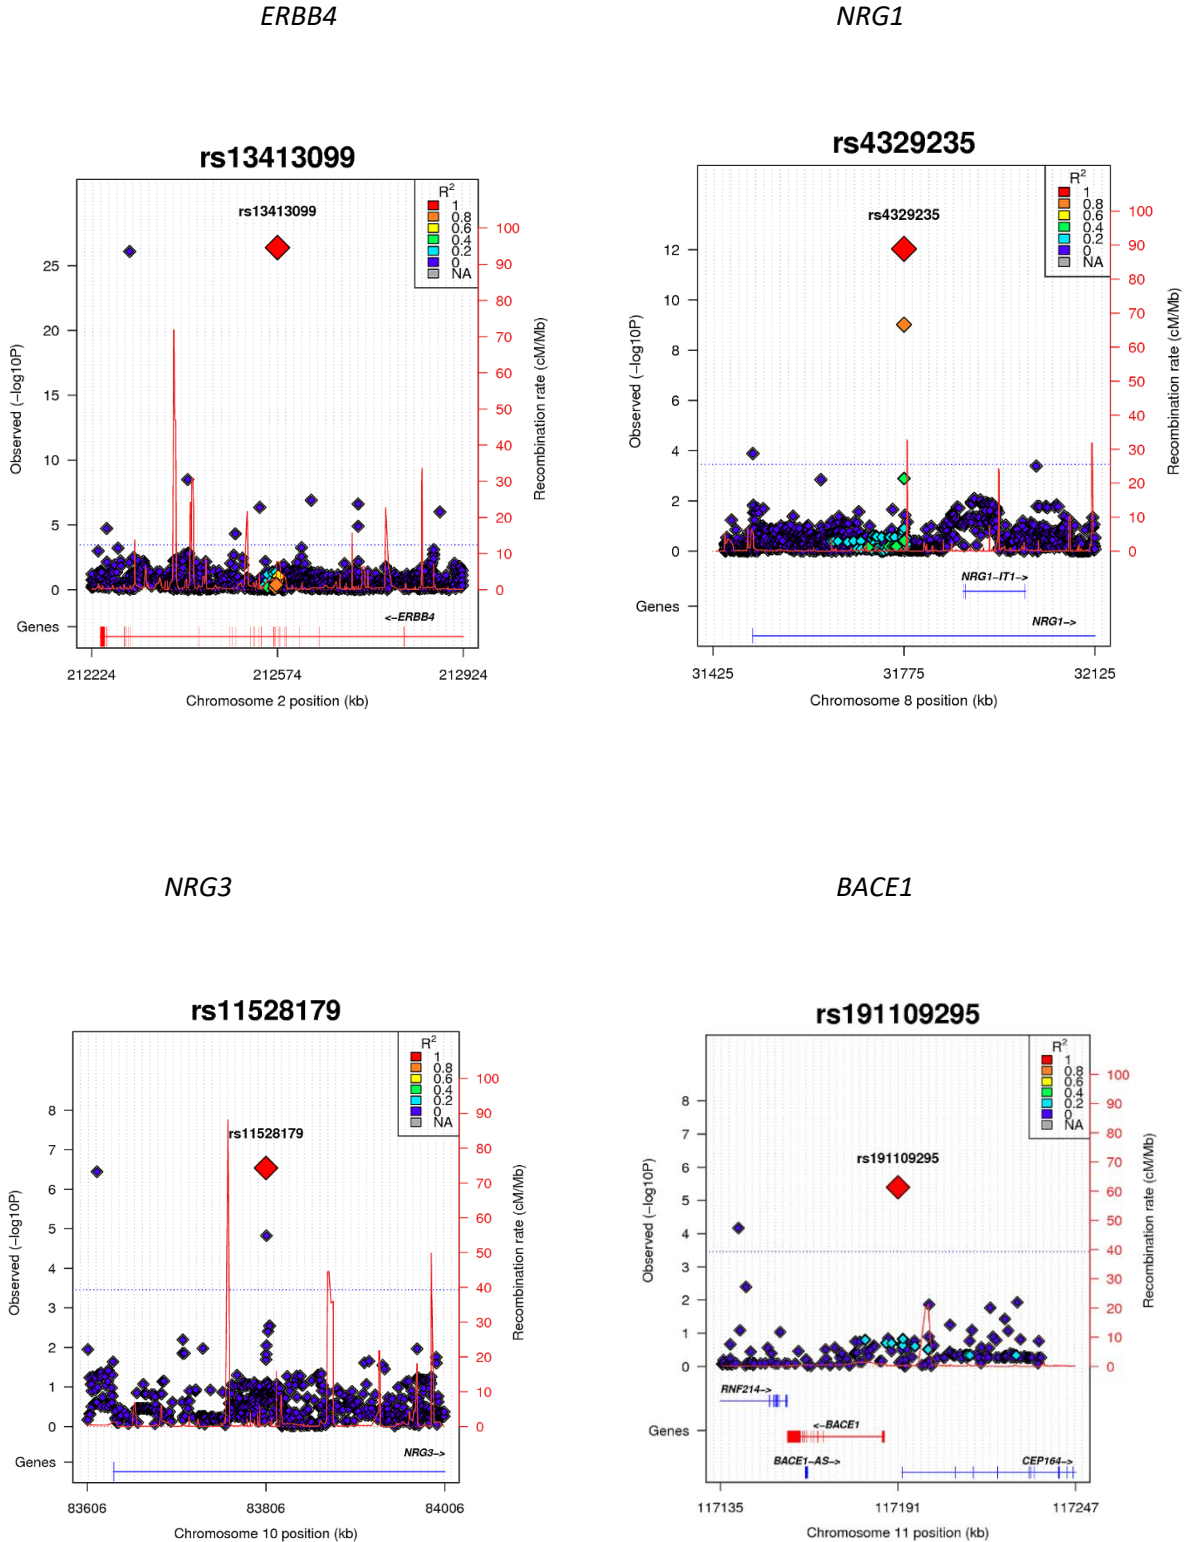

*APH1A*

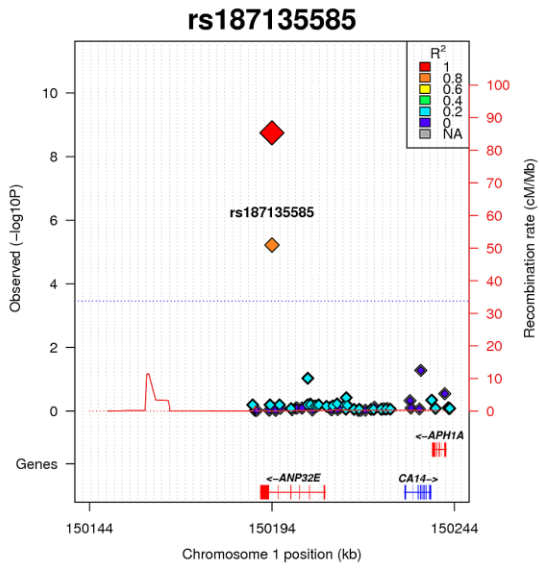

*PSEN2*

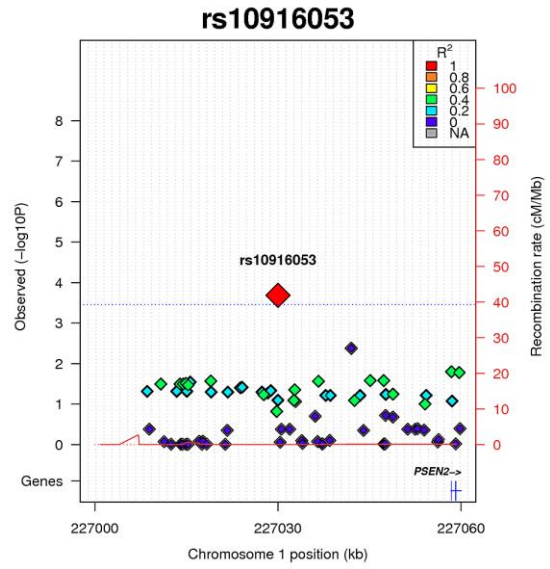

*PSENE1*

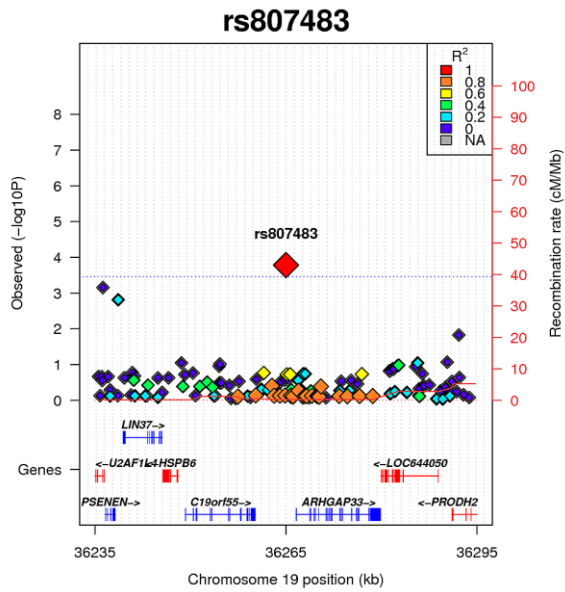

Supplement: tp2017183x2.pdf [file tp2017183x2.pdf]
