# Supplementary material for: Neuregulin signaling pathway in smoking behavior
Source: PubMed Central journal article supplement (PMC5611747; doi:10.1038/tp.2017.183), 2017-08-22

**Supplementary figure 3.** Regional plot for *ERBB4* SNP rs13385826 showing association with ND diagnosis.

Threshold line corresponds to FDR p=0.05.

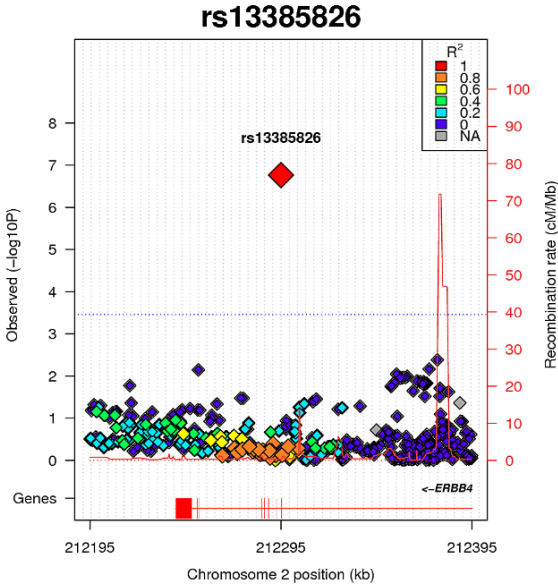

Supplement: tp2017183x3.pdf [file tp2017183x3.pdf]
