# Supplementary material for: Neuregulin signaling pathway in smoking behavior
Source: PubMed Central journal article supplement (PMC5611747; doi:10.1038/tp.2017.183), 2017-08-22

**Supplementary figure 5.** Boxplot showing expression level difference between current daily, occasional and never smoker for *NRG1* and *PSEN1*.

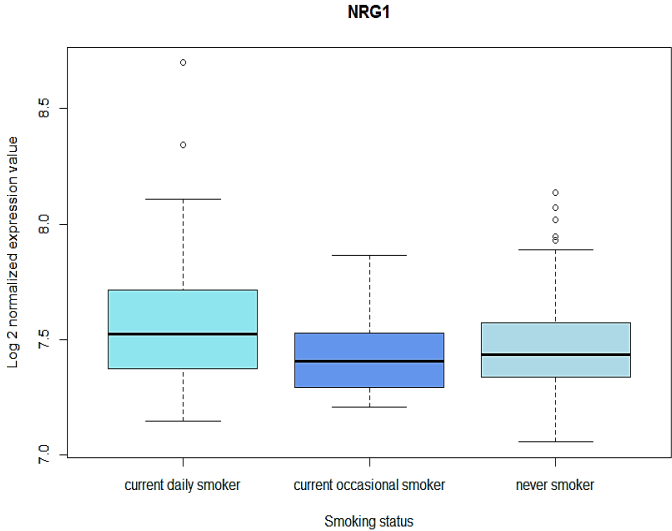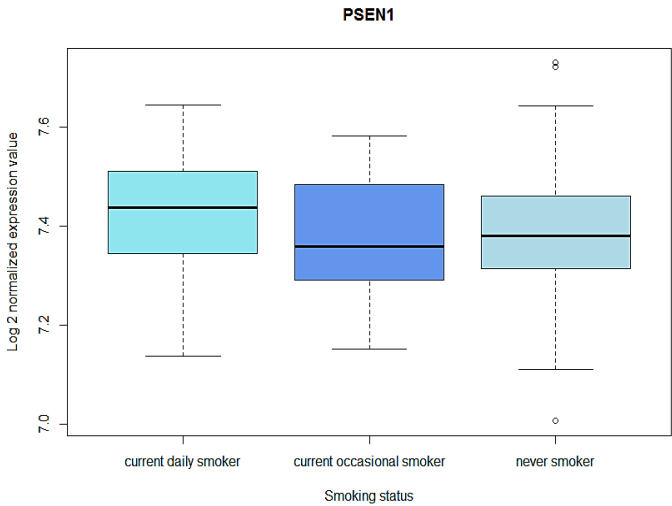

Supplement: tp2017183x5.pdf [file tp2017183x5.pdf]
